# Supplementary material for: Trifuhalol A Suppresses Allergic Inflammation through Dual Inhibition of TAK1 and MK2 Mediated by IgE and IL-33
Source: MDPI journal article supplement (doi:10.3390/ijms231710163), 2022-09-05
Supplement: s1 [file s1]

## Supplementary data

### **Trifluhalol A suppresses allergic inflammation through dual inhibition of TAK1 and MK2 mediated by IgE and IL-33**

Sim-Kyu Bong<sup>1</sup>, No-June Park<sup>1,2</sup>, Sang Heon Lee<sup>1</sup>, Jin Woo Lee<sup>1</sup>, Aaron Taehwan Kim<sup>3</sup>, Xiaoyong  
Liu<sup>4</sup>, Sang Moo Kim<sup>5</sup>, Min Hye Yang<sup>6</sup>, Yong Kee Kim<sup>7,\*</sup>, Su-Nam Kim<sup>1,2,\*</sup>

<sup>1</sup> Natural Products Research Institute, Korea Institute of Science and Technology, 679 Saimdang-ro, Gangneung, Gangwon-do 25451, Republic of Korea.

<sup>2</sup> Division of Bio-Medical Science and Technology, KIST School, University of Science and Technology, Seoul, 02792, Republic of Korea

<sup>3</sup> Department of Food Science, University of Massachusetts, Amherst, MA, USA

<sup>4</sup> Haizhibao Deutschland GmbH, Heiliggeistgasse 28, 85354 Freising Munich, Germany.

<sup>5</sup> Department of Marine Food Science and Technology, Gangneung-Wonju National University, 7 Jukheon-gil, Gangneung 25457, Republic of Korea

<sup>6</sup> College of Pharmacy, Pusan National University, Busan 46241, Republic of Korea

<sup>7</sup> College of Pharmacy, Sookmyung Women's University, Seoul 04310, Republic of Korea

**\*Corresponding author:** Yong Kee Kim, Ph.D., College of Pharmacy, Sookmyung Women's University, 100 Cheongpa-ro 47-gil, Yongsan-gu, Seoul 04610, Republic of Korea, Tel: +82-2-2077-7688, Fax: +82-2-710-9871, E-mail: yksnbk@sookmyung.ac.kr; Su-Nam Kim, Ph.D., Natural Products Research Institute, Korea Institute of Science and Technology, 679 Saimdang-ro, Gangneung, Gangwon-do 25451, Republic of Korea, Tel: +82-33-650-3503, Fax: +82-33-650-3529, E-mail: snkim@kist.re.kr

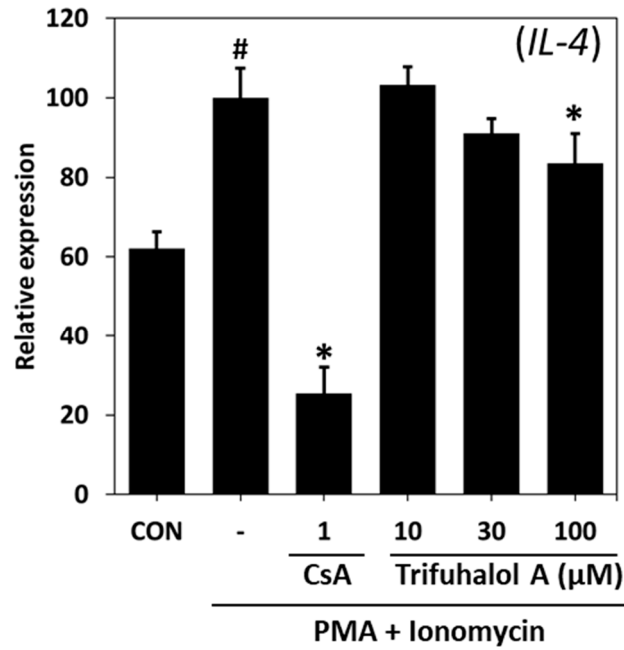

**Supplementary Figure S1.** Effects of trifluhalol A on IL-4 production. Representative data of qPCR analysis of IL-4 mRNA normalized to GAPDH in PMA/ionomycin (PI)-induced RBL-2H3 cells. RBL-2H3 cells were treated with trifluhalol A in combination with PMA (50  $\mu\text{g/ml}$ )/ionomycin (0.1  $\mu\text{M}$ ) for 8 h to measure IL-4 expression. Each bar represents the mean  $\pm$  S.D. of duplicates. # $P < 0.05$  vs. control; \* $P < 0.05$  vs. PI-induced group. CsA; 1 $\mu\text{M}$  of cyclosporine A.
